# Supplementary material
Source: PubMed Central journal article supplement (PMC1276085)

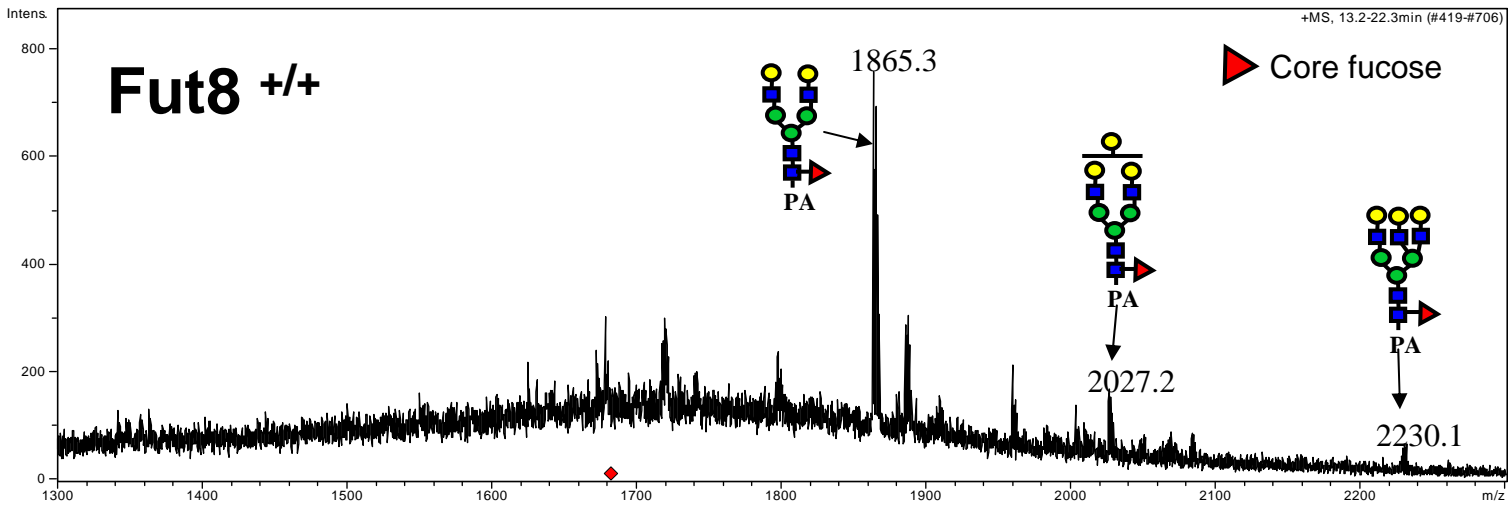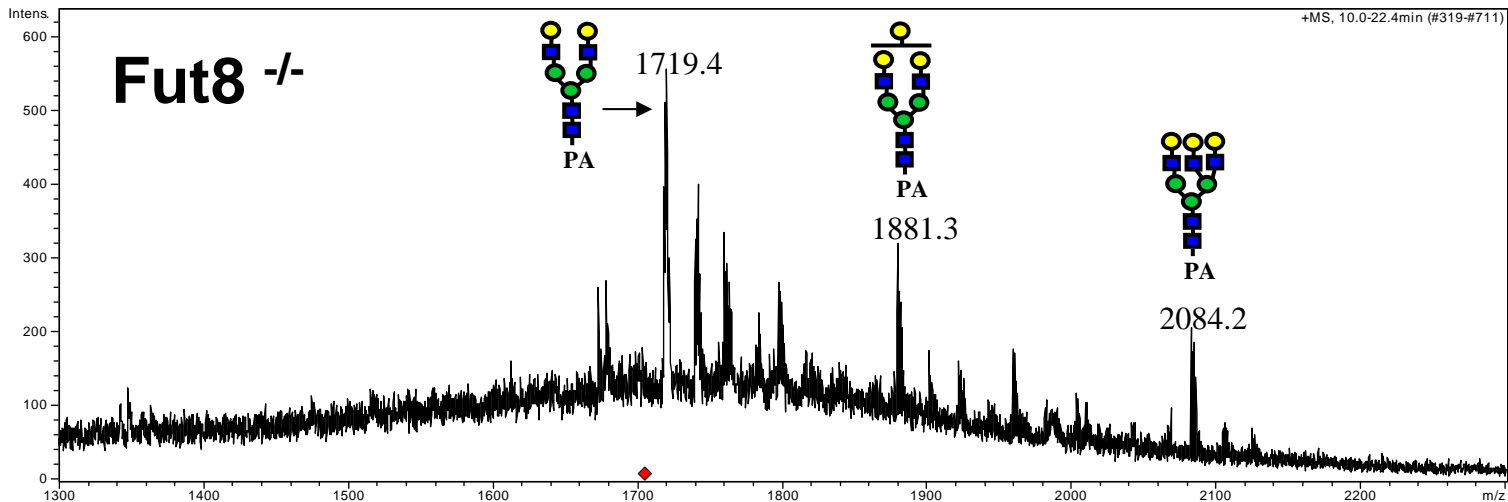

Supplement: pnas_0507375102_1.pdf [file pnas_0507375102_1.pdf]

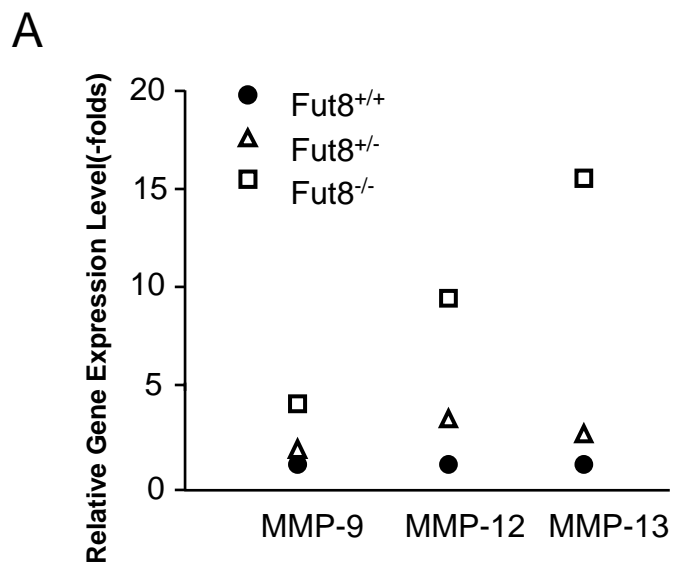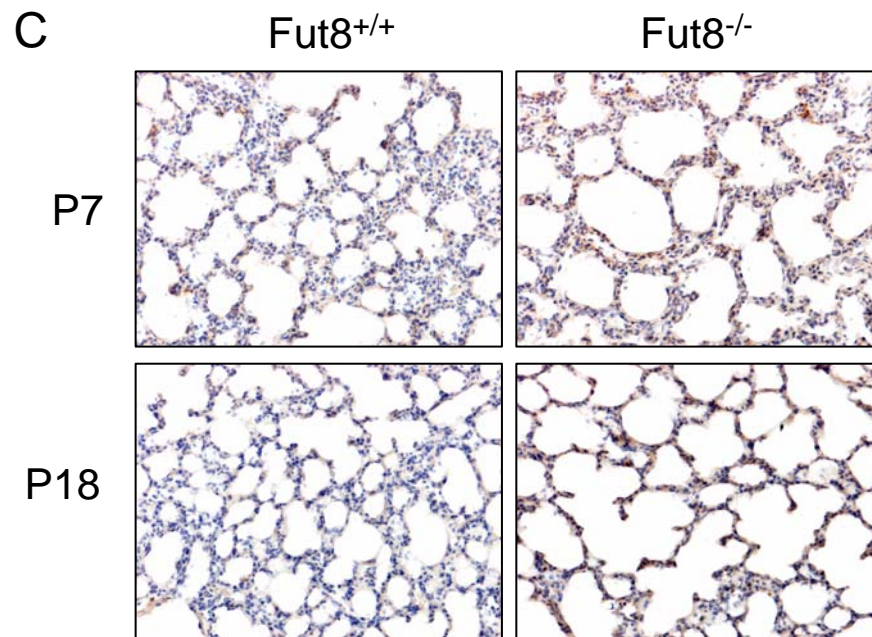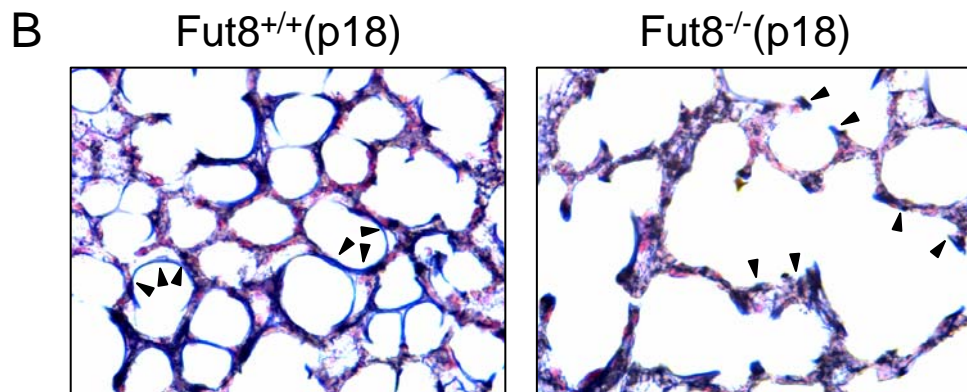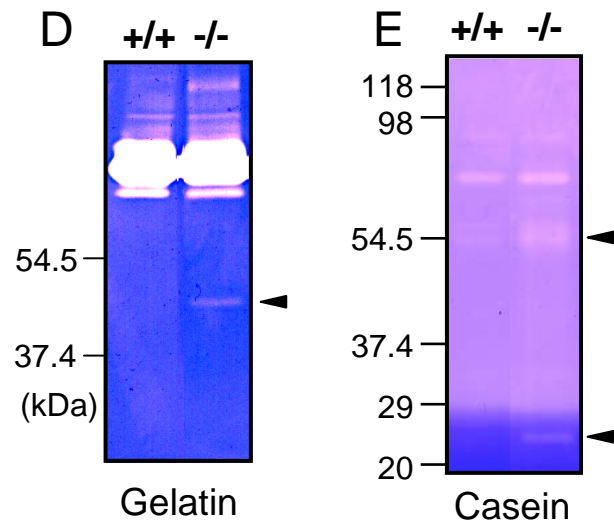

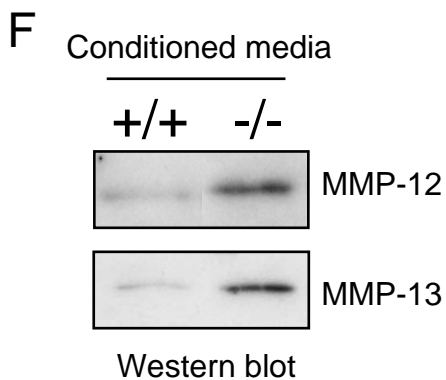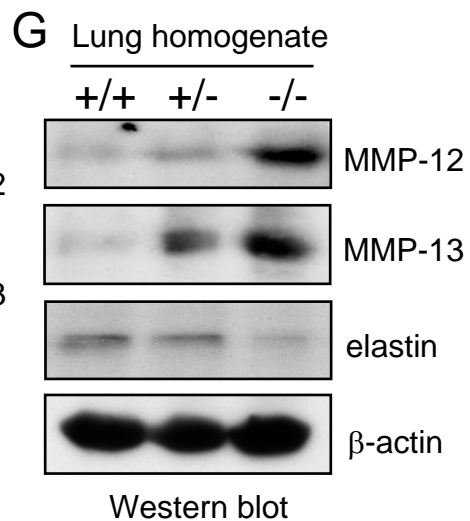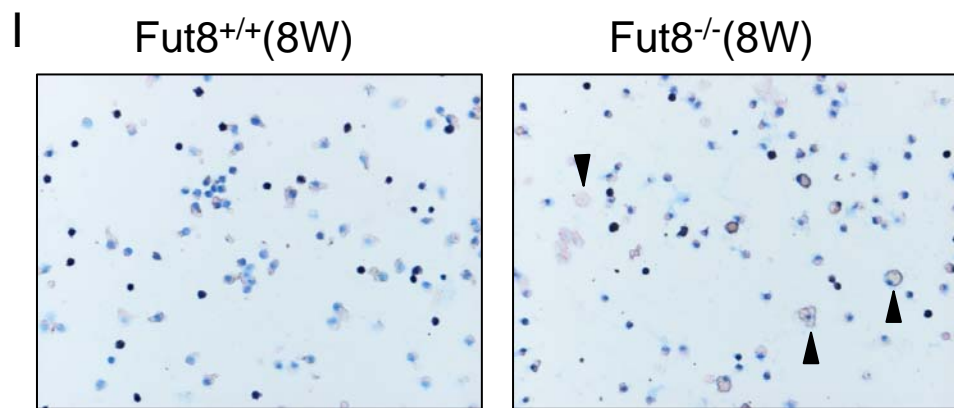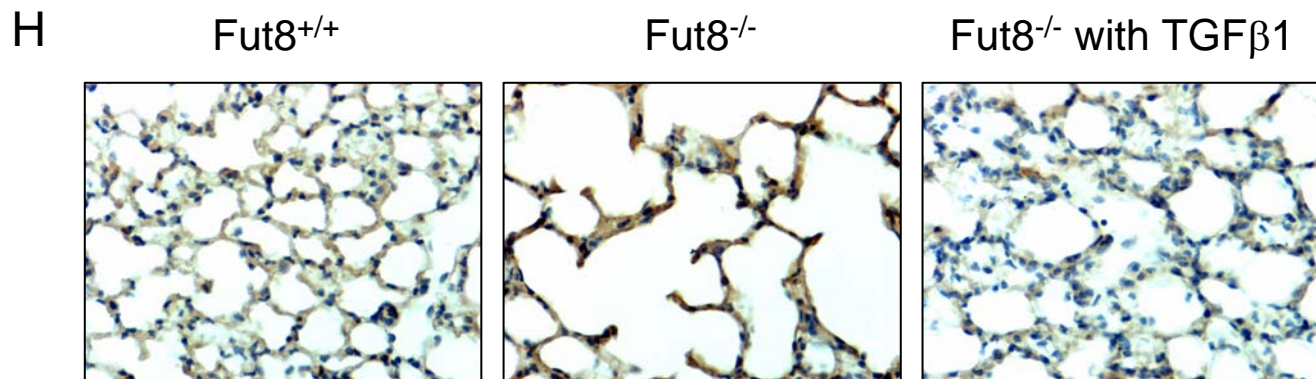

Supplement: pnas_0507375102_2.pdf [file pnas_0507375102_2.pdf]

**Fut8<sup>+/+</sup>****Fut8<sup>-/-</sup>****Fut8<sup>+/+</sup>****Fut8<sup>-/-</sup>**

E14.5

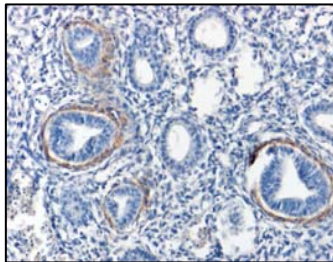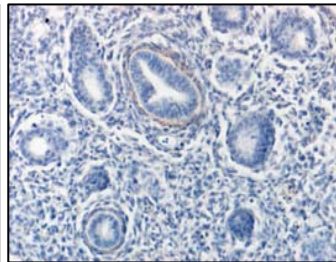

p3

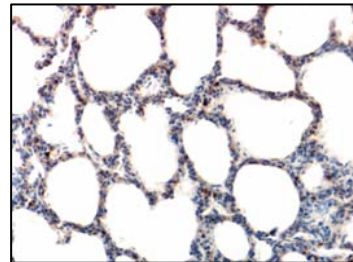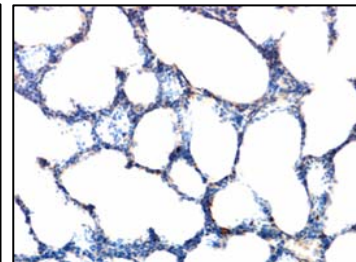

E15.5

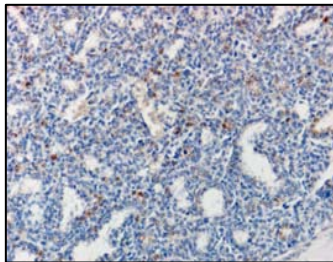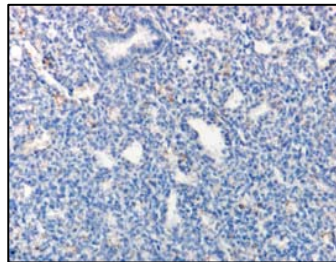

p7

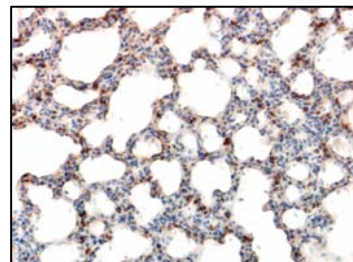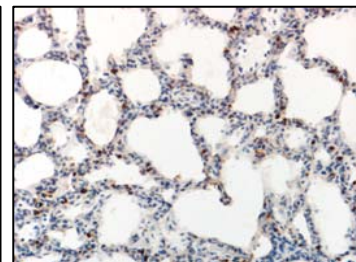

E18.5

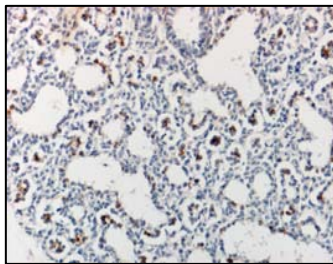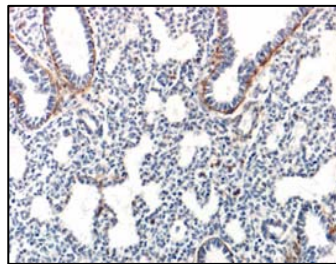

p18

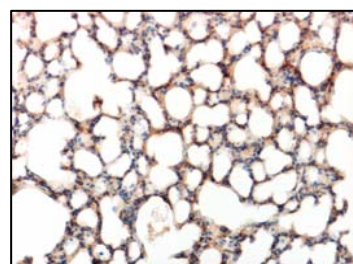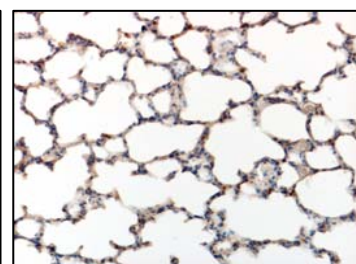

Supplement: pnas_0507375102_3.pdf [file pnas_0507375102_3.pdf]
